# Supplementary material
Source: publisher site journal article supplement (https://www.spandidos-publications.com/5832/downloadSupplementary)
Supplement: Supplementary file 1 [file downloadSupplementary]

**Table SI. Pathways or molecular mechanisms related to the antitumor effects or DCs in CCA.**

| Pathway/molecular mechanism   | Results                                                                                                                                                                                                           | (Refs.) <sup>a</sup> |
|-------------------------------|-------------------------------------------------------------------------------------------------------------------------------------------------------------------------------------------------------------------|----------------------|
| JAK-STAT3, TGF- $\beta$ /Smad | Knockdown of TGF- $\beta$ RII and IL-10RA mRNA by transducing self-differentiated DCs with a short-hairpin RNA lentiviral increases the antitumor activity of T-cells.                                            | (99)                 |
|                               | Inhibition of the IL-10 and TGF- $\beta$ receptors on DCs significantly enhances cytolytic activity of effector T-cells.                                                                                          | (100)                |
| LAG-3, PD-1/PD-L1             | Co-blockade of LAG-3 and PD-L1 promotes antigen cross-presentation by DCs and subsequently potentiate CD8 <sup>+</sup> T-cell cytotoxicity.                                                                       | (101)                |
| CD40-CD40L                    | Activation of the CD40-CD40L pathway upregulates Th1-cytokines, leading to the immune regulatory function of DCs, promoting tumor-specific effector cell proliferation and cytotoxicity towards bile duct tumors. | (104)                |
| CD40-CD40L, PD-1/PD-L1        | Activation of the CD40-CD40L pathway can stimulate DCs and increase the response to PD-1 antagonist in murine iCCA growth.                                                                                        | (175)                |

<sup>a</sup>The cited references can be found in the reference list in the main manuscript. DCs, dendritic cells; PD-1, programmed cell death protein 1; PD-L1, programmed cell death ligand 1; LAG-3, lymphocyte-activation gene 3; iCCA, intrahepatic cholangiocarcinoma.
